# Supplementary material for: Combinatorial design of a sialic acid imprinted binding site exploring a dual ion receptor approach
Source: Royal Society of Chemistry journal article supplement (doi:10.1039/d1ra06962d), 2021-01-01
Supplement: d1ra06962d1.pdf [file d1ra06962d1.pdf]

## Supporting Information

# Combinatorial design of a sialic acid imprinted binding site exploring a dual ion receptor approach

Mavliutova L.,<sup>a</sup> Verduci E.,<sup>a</sup> Sellergren B.<sup>a,\*</sup>

<sup>a</sup> Department of Biomedical Sciences, Faculty of Health and Society, Malmö University, SE-20506 Malmö, Sweden. E-mail: borje.sellergren@mau.se

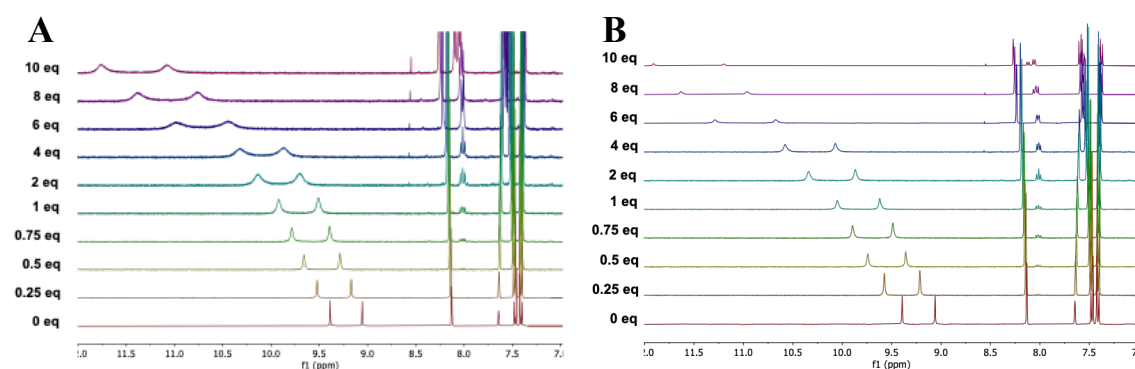

**Figure S1.** <sup>1</sup>H NMR spectra of FM1 with increasing amount of SA·Na (A) and SA·Na18C6 (B) in DMSO-d<sub>6</sub>.

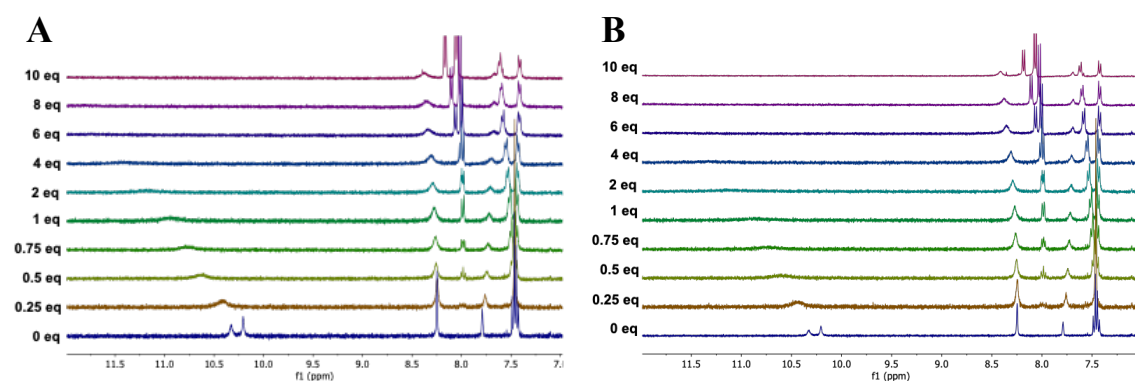

**Figure S2.** <sup>1</sup>H NMR spectra of FM2 with increasing amount of SA·Na (A) and SA·Na18C6 (B) in DMSO-d<sub>6</sub>.

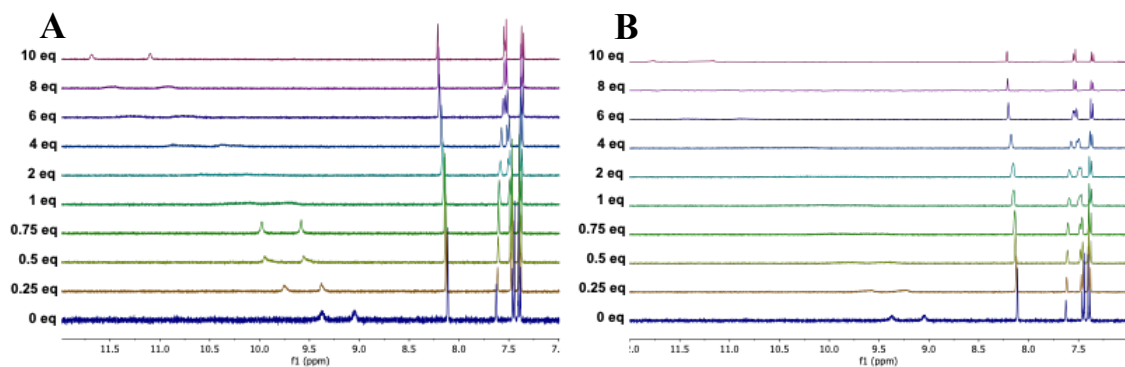

**Figure S3.**  $^1\text{H}$  NMR spectra of FM1 with increasing amount of GA·Na (A) and GA·Na18C6 (B) in DMSO- $d_6$ .

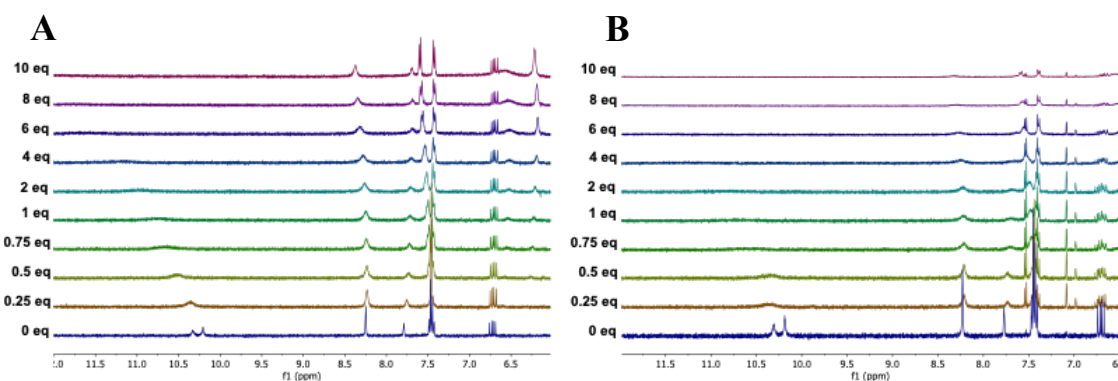

**Figure S4.**  $^1\text{H}$  NMR spectra of FM2 with increasing amount of GA·Na (A) and GA·Na18C6 (B) in DMSO- $d_6$ .

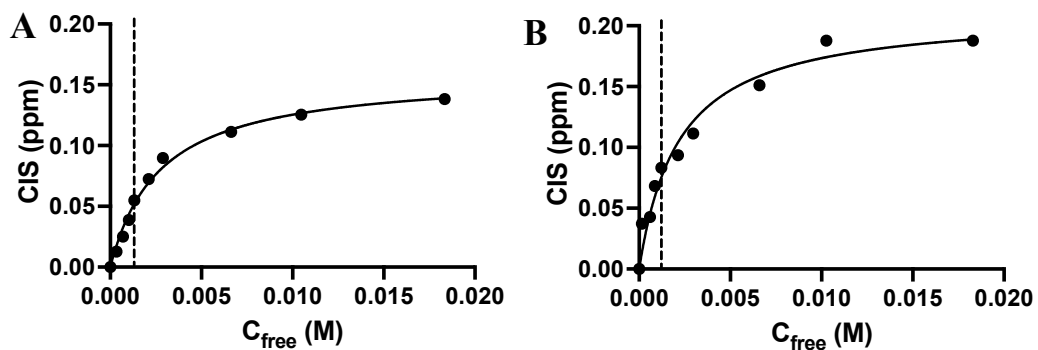

**Figure S5.** Complexation induced shifts of H<sup>a</sup> protons of FM2 upon addition of GA·Na (A) and GA·Na18C6 (B) in DMSO-d<sub>6</sub>, fitted to one site specific binding isotherm.

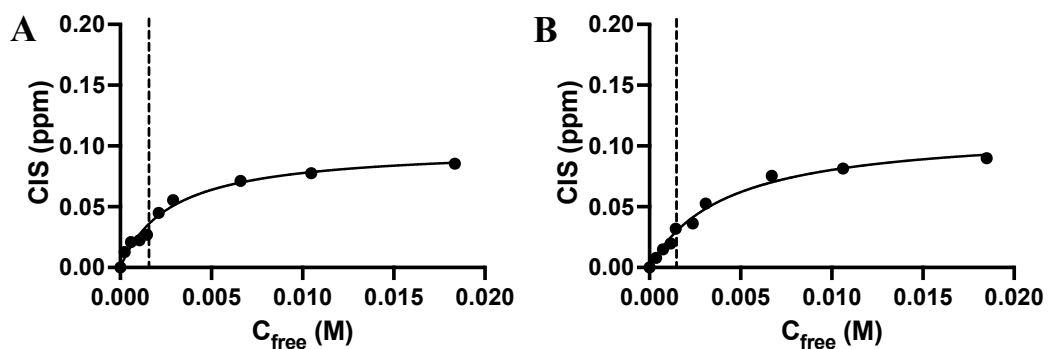

**Figure S6.** Complexation induced shifts of H<sup>a</sup> protons of FM1 upon addition of GA·Na (A) and GA·Na18C6 (B) in DMSO-d<sub>6</sub>, fitted to one site specific binding isotherm.

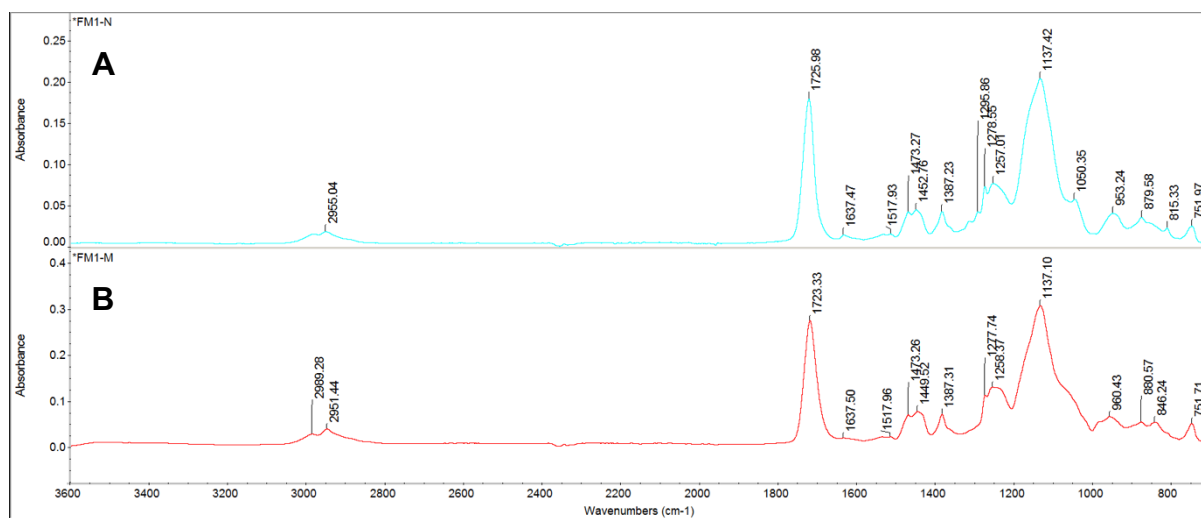

**Figure S7.** FTIR spectra of **P<sub>N</sub>1** (A) and **P<sub>1</sub>** (B) polymers.

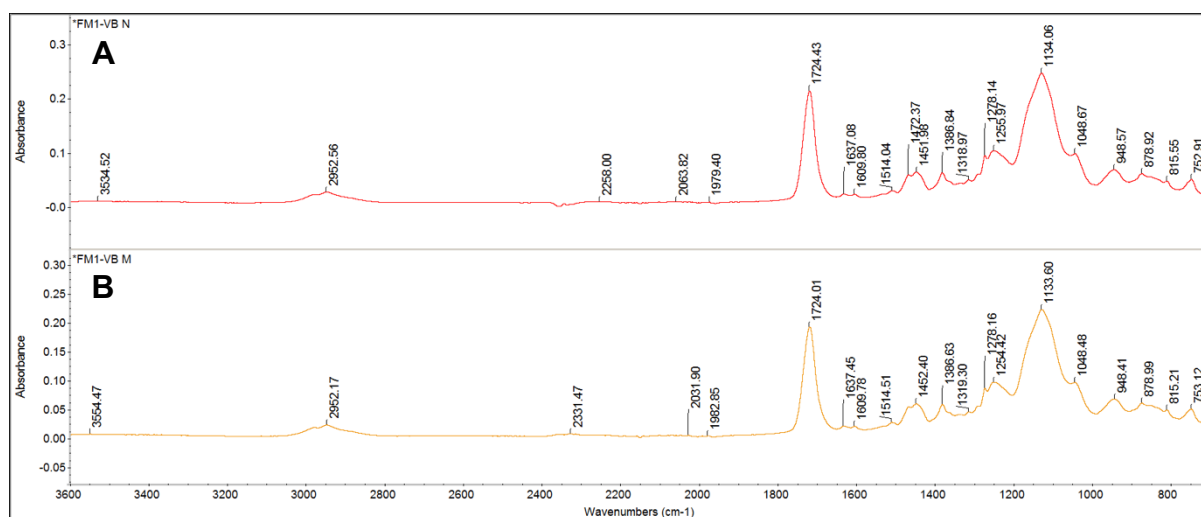

**Figure S8.** FTIR spectra of **P<sub>N</sub>2** (A) and **P<sub>2</sub>** (B) polymers.

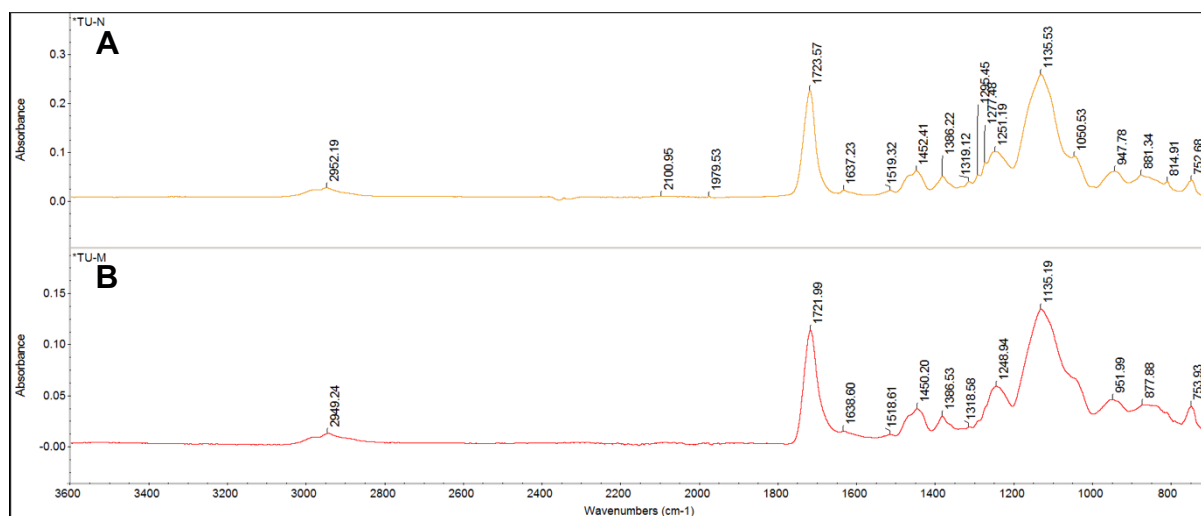

**Figure S9.** FTIR spectra of **P<sub>N</sub>3** (A) and **P3** (B) polymers.

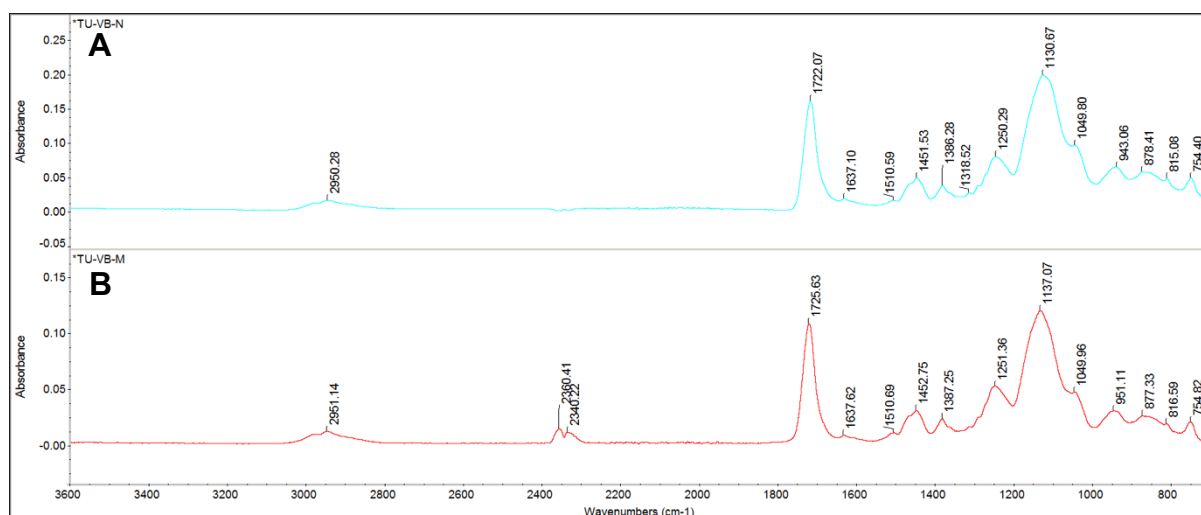

**Figure S10.** FTIR spectra of **P<sub>N</sub>4** (A) and **P4** (B) polymers.

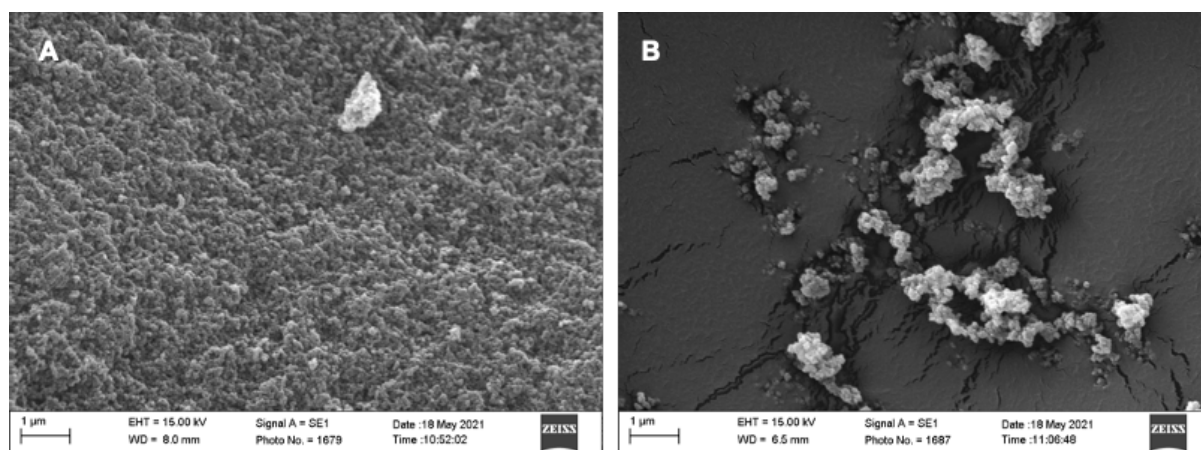

**Figure S11.** SEM images of P1 (A) and P<sub>N</sub>1 (B) at x25000 magnification.

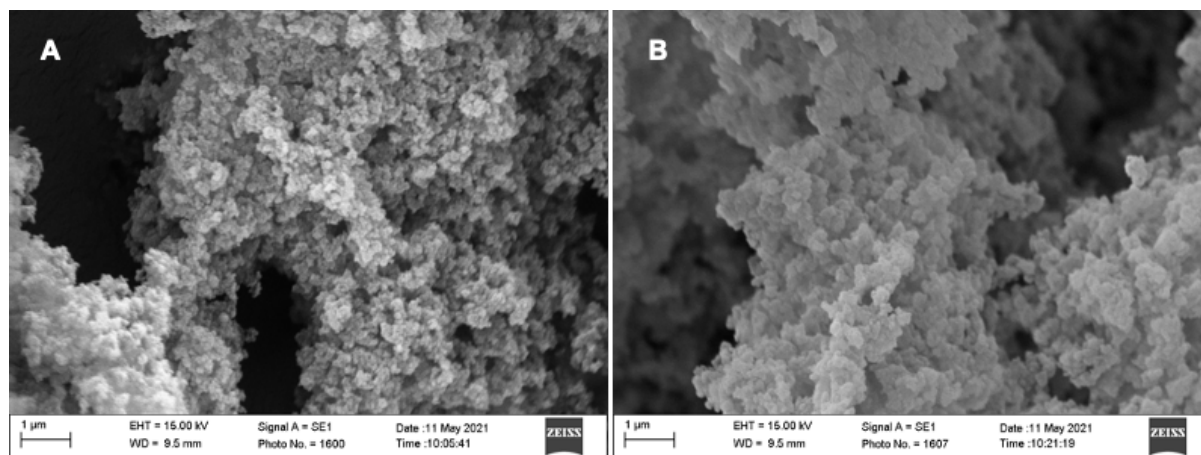

**Figure S12.** SEM images of P2 (A) and P<sub>N</sub>2 (B) at x25000 magnification.

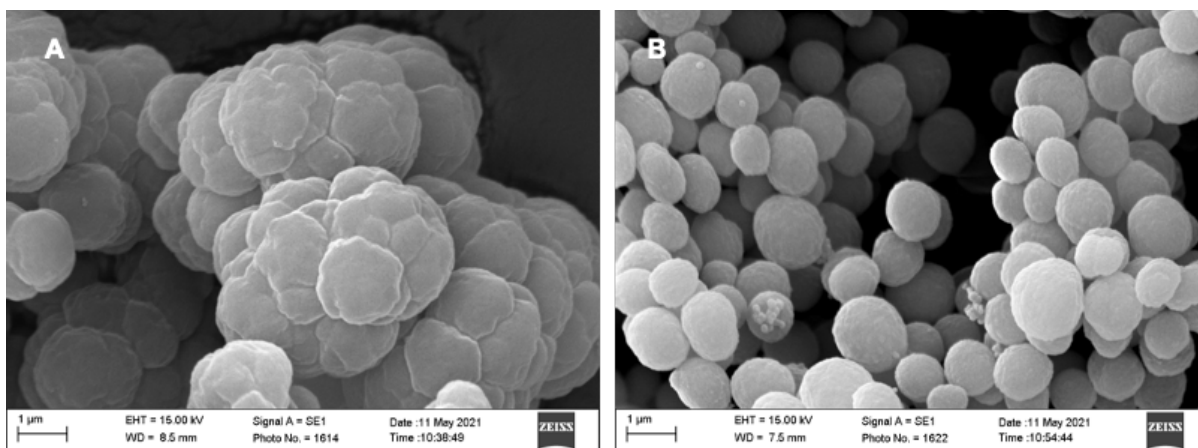

**Figure S13.** SEM images of **P3** (A) and **PN3** (B) at x25000 magnification.

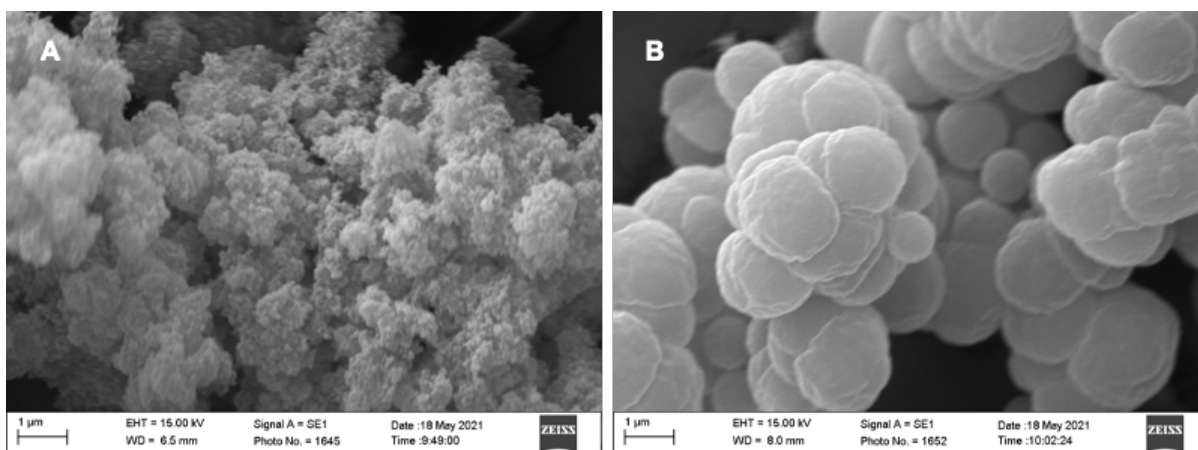

**Figure S14.** SEM images of **P4** (A) and **PN4** (B) at x25000 magnification.

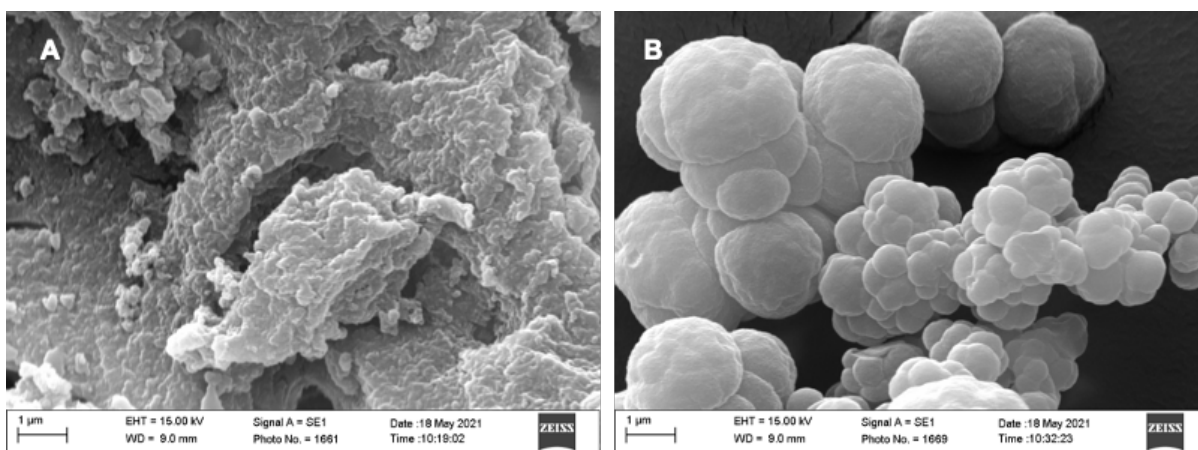

**Figure S15.** SEM images of **P5** (A) and **PN5** (B) at x25000 magnification.

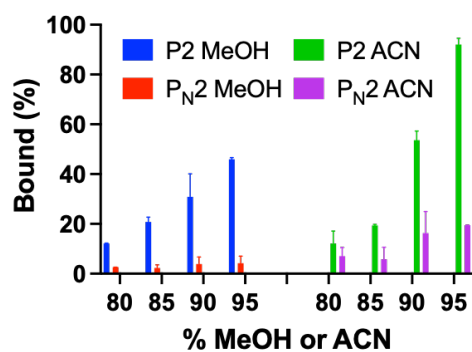

**Figure S16.** Batch binding of control polymers P2/P<sub>N</sub>2 with 0.5 mM SA·Na in 80-95% MeOH and 80-95% ACN.

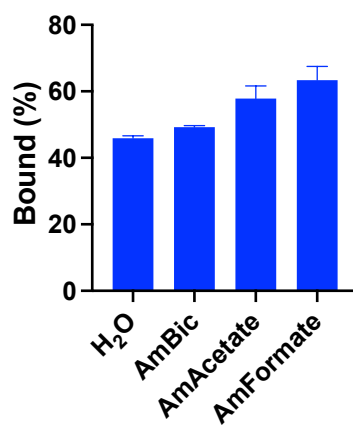

**Figure S17.** SA·Na-MIP P2 batch binding with 0.5 mM SA·Na in 95% MeOH with 50 mM ammonium buffers – bicarbonate, acetate and formate.



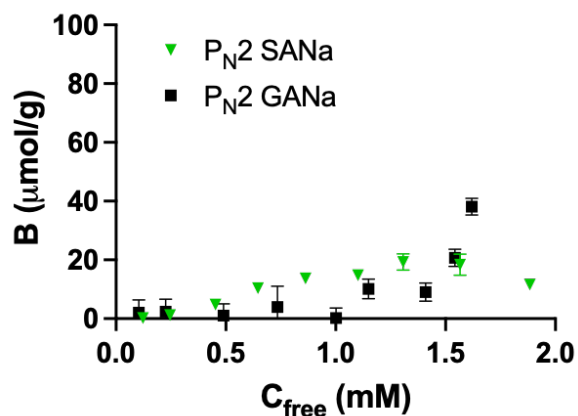

**Figure S18.** Binding isotherms of non-imprinted polymer  $P_{N2}$  with  $GA \cdot Na$  in 95% MeOH.

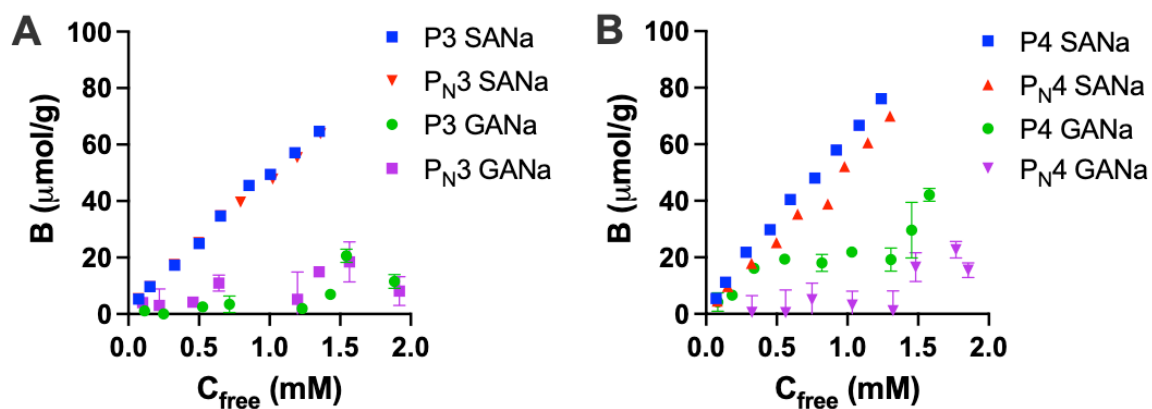

**Figure S19.** Binding isotherms in 95% MeOH with  $SA \cdot Na$  and  $GA \cdot Na$  for thiourea-based polymers  $P3/P_{N3}$  (A) and  $P4/P_{N4}$  (B).

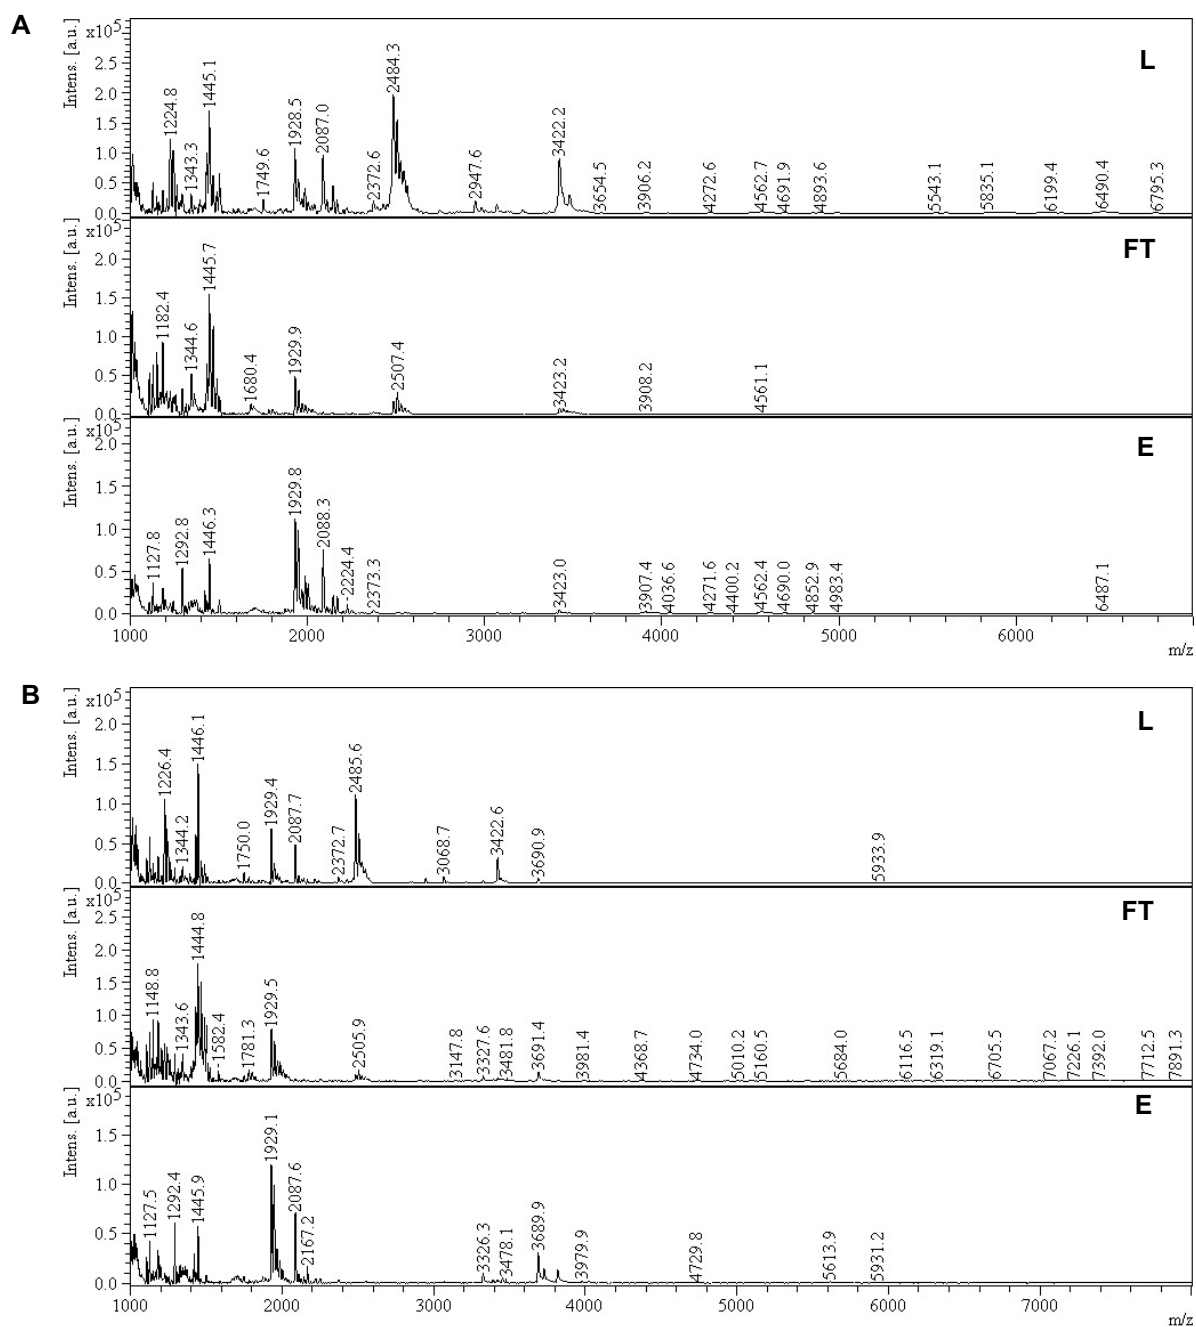

**Figure S20.** MALDI-TOF-MS of tryptic peptide mixture of fetuin bovine (A) and sialidase treated fetuin bovine (B). General peptide spectrum with loading (L), flowthrough (FT), elution (E) fractions after incubation with **P2**.

**Table S1.** Values obtained from fitting binding isotherm of **P2** with SA-Na and GA-Na in 95% methanol to one site specific binding isotherm.

|                                  | SA•Na          | GA•Na       |
|----------------------------------|----------------|-------------|
| One site -- Specific binding [2] |                | Interrupted |
| Best-fit values                  |                |             |
| Bmax                             | 76.44          | n/a         |
| Ka                               | 2.650          | n/a         |
| Std. Error                       |                |             |
| Bmax                             | 3.659          |             |
| Ka                               | 0.3673         |             |
| 95% CI (asymptotic)              |                |             |
| Bmax                             | 68.59 to 84.29 |             |
| Ka                               | 1.862 to 3.438 |             |
| Goodness of Fit                  |                |             |
| Degrees of Freedom               | 14             |             |
| R squared                        | 0.9674         |             |
| Sum of Squares                   | 133.0          |             |
| Sy.x                             | 3.082          |             |

**Table S2.** Values obtained from fitting binding isotherm of **P6** with SA-Na and GA-Na in 95% methanol to one site specific binding isotherm.

|                                  | SA•Na       | GA•Na             |
|----------------------------------|-------------|-------------------|
| One site -- Specific binding [2] | Interrupted |                   |
| Best-fit values                  |             |                   |
| Bmax                             | n/a         | 77.36             |
| Ka                               | n/a         | 1.381             |
| Std. Error                       |             |                   |
| Bmax                             |             | 15.26             |
| Ka                               |             | 0.5994            |
| 95% CI (asymptotic)              |             |                   |
| Bmax                             |             | 41.28 to 113.4    |
| Ka                               |             | -0.03672 to 2.798 |
| Goodness of Fit                  |             |                   |
| Degrees of Freedom               |             | 7                 |
| R squared                        |             | 0.9138            |
| Sum of Squares                   |             | 203.9             |
| Sy.x                             |             | 5.397             |
